# Supplementary material for: RuCo alloy bimodal nanoparticles embedded in N-doped carbon: a superior pH-universal electrocatalyst outperforms benchmark Pt for the hydrogen evolution reaction
Source: Royal Society of Chemistry journal article supplement (doi:10.1039/d0ta04491a), 2020-01-01
Supplement: d0ta04491a1.pdf [file d0ta04491a1.pdf]

## Supporting Information

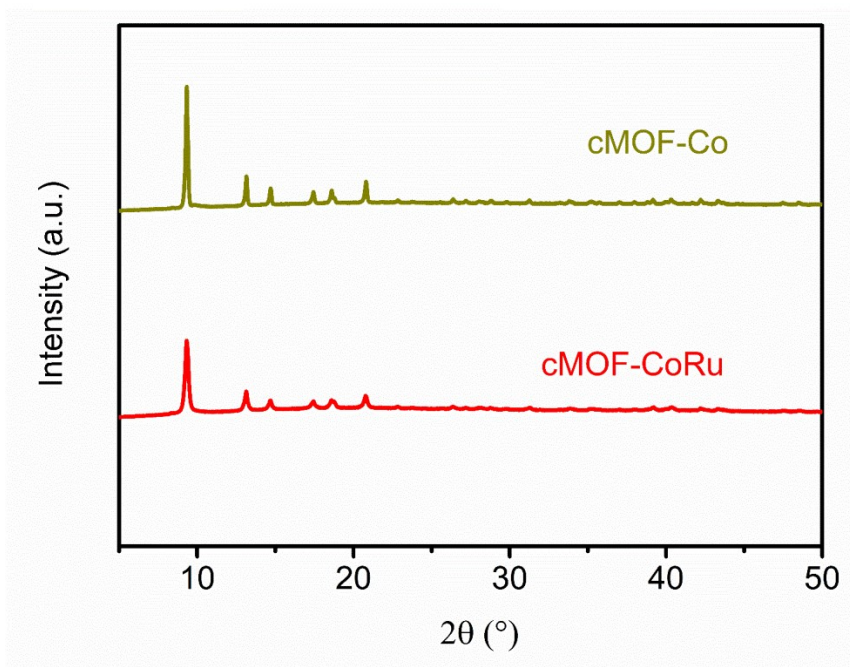

**Fig. S1.** X-ray diffraction patterns of cMOF-Co and cMOF-CoRu.

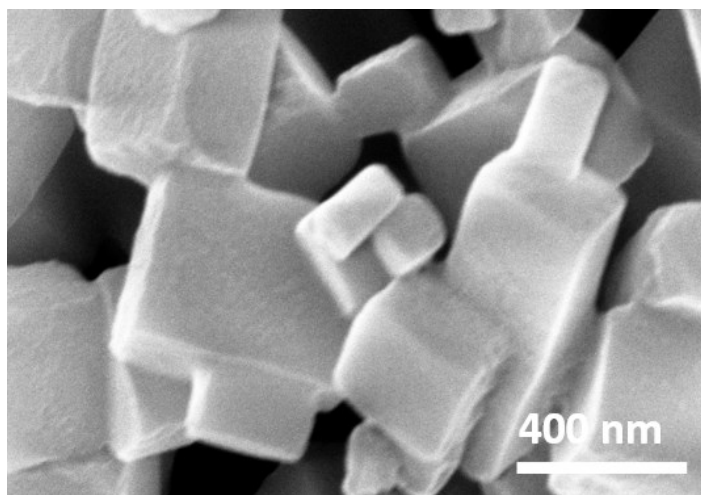

**Fig. S2.** SEM image of cMOF-Co.

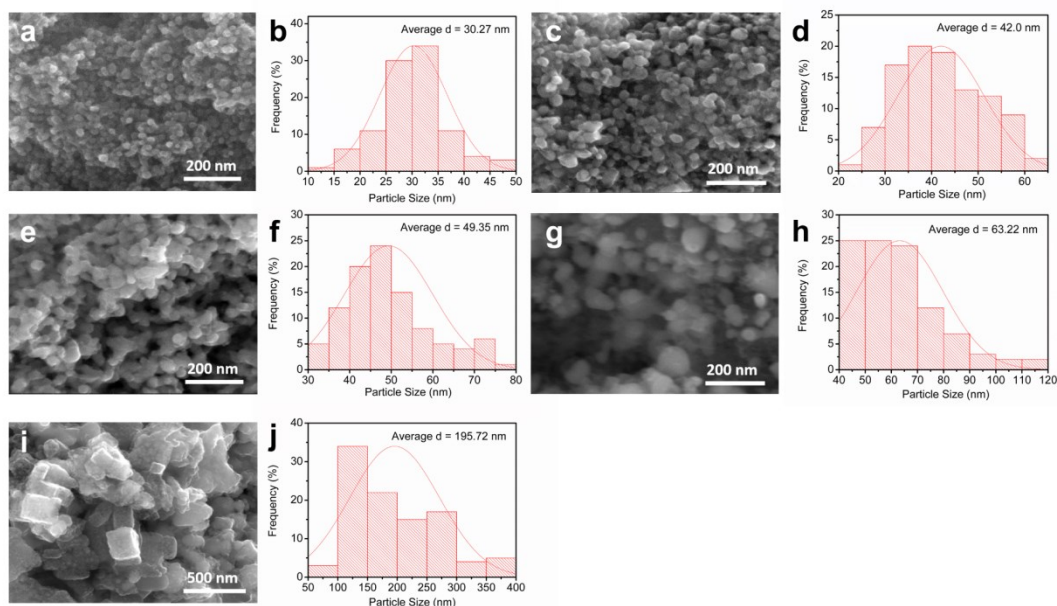

**Fig. S3.** SEM images of (a) RuCo@NC-500, (c) RuCo@NC-600, (e) RuCo@NC-700, (g) RuCo@NC-800 and (i) Co@NC-600. Particle size distribution diagrams of (b) RuCo@NC-500, (d) RuCo@NC-600, (f) RuCo@NC-700, (h) RuCo@NC-800 and (j) Co@NC-600.

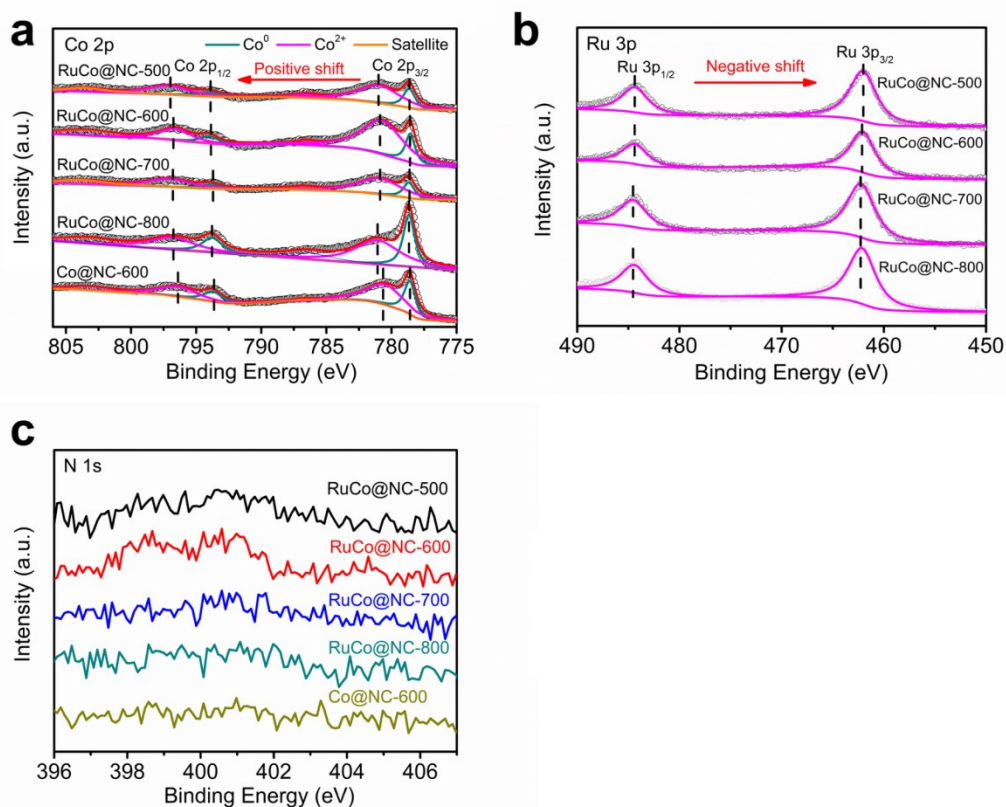

**Fig. S4.** (a) XPS spectra of Co 2p and (b) Ru 3p for RuCo@NC-T and Co@NC-600. (c) High-resolution XPS spectrum of N 1s for RuCo@NC-T and Co@NC-600.

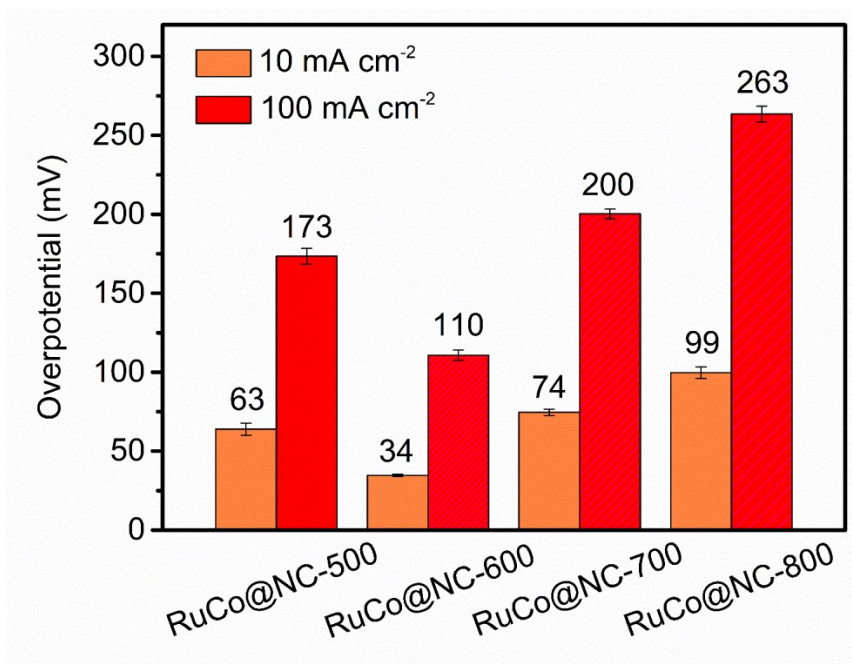

**Fig. S5.** Overpotential at -10 and -100 mA cm<sup>-2</sup> for RuCo@NC-T catalysts in 1.0 M KOH solution.

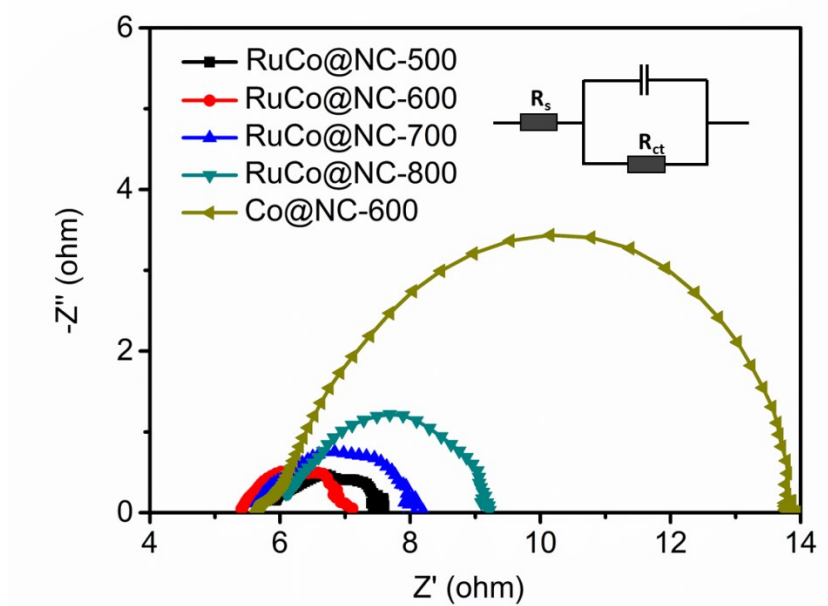

**Fig. S6.** Nyquist plots of RuCo@NC-T and Co@NC-600 in 1.0 M KOH solution.



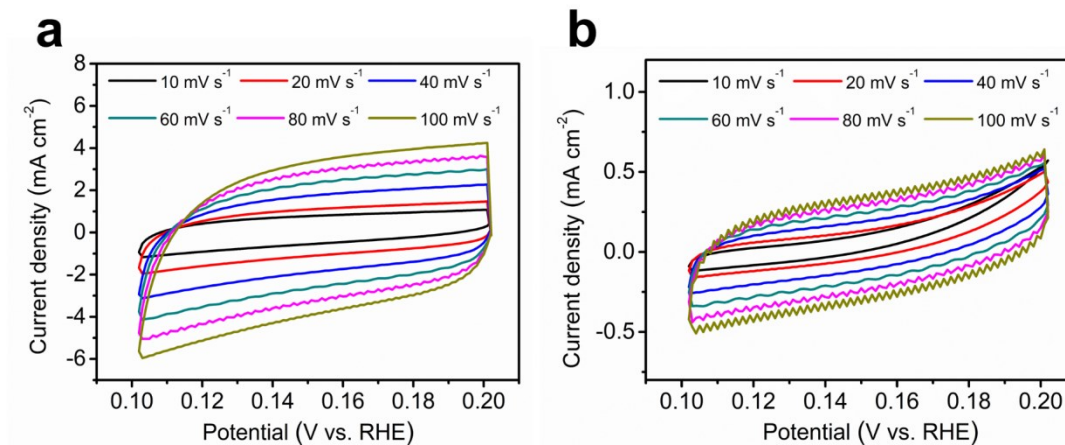

**Fig. S7.** The cyclic voltammetry (CV) measurements tested within the range of 0.1 to 0.2 V vs. RHE at different scan rates (0.01-0.1 V s<sup>-1</sup>) for (a) RuCo@NC-600 and (b) Co@NC-600 in 1.0 M KOH solution.

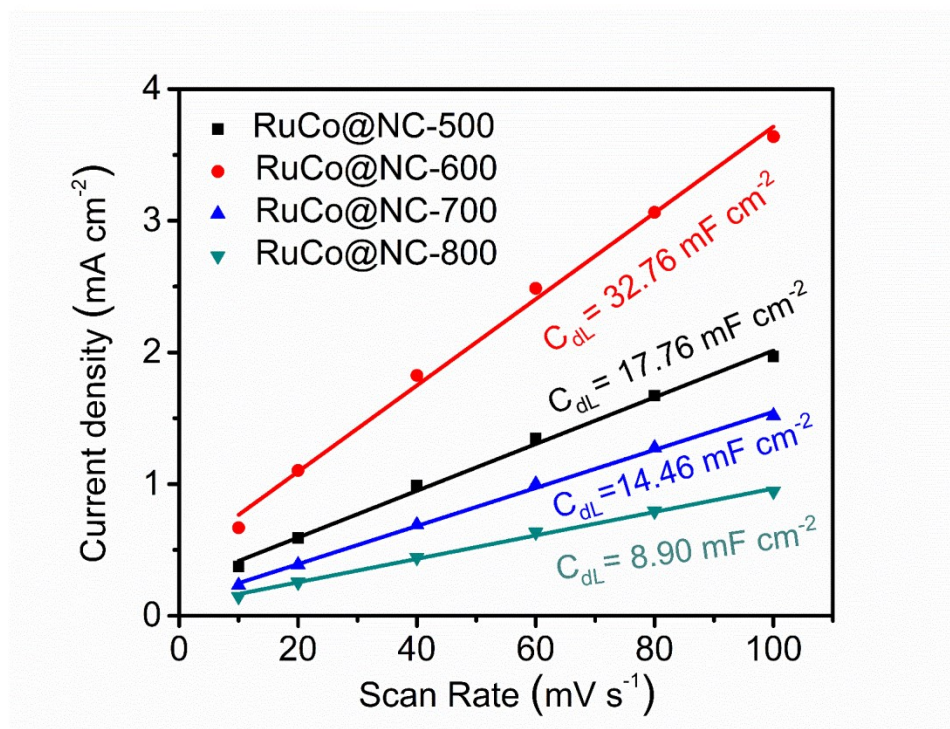

**Fig. S8.** Linear fitting of the capacitive currents versus CV scan rates for RuCo@NC-T in 1.0 M KOH solution.

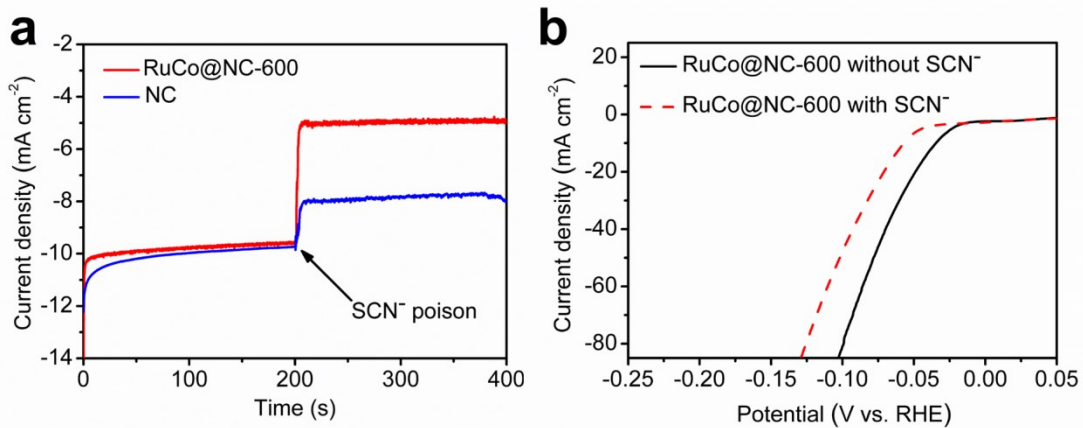

**Fig. S9.** (a) Current-time curve of RuCo@NC-600 and NC samples before and after the introduction of  $\text{SCN}^-$  ions. (b) LSV polarization curves for HER on RuCo@NC-600 in 1.0 M KOH without (solid line) and with (dot line) 10 mM KSCN.

#### Calculation of the Turnover Efficiency (TOF)

The TOF value of samples can be calculated based on the following equation:

$$\text{TOF (H}_2 \text{ s}^{-1}) = j \cdot S / (2 \cdot F \cdot n)$$

Here,  $j$  represents the current density during linear sweeping.  $S$  represents the surface area of electrode.  $F$  is the Faradaic constant ( $96485.3 \text{ C mol}^{-1}$ ).  $1/2$  indicates two electrons are required to form a hydrogen molecule.  $n$  represents the number of active sites.<sup>S1</sup>

The number of active sites ( $n$ ) can be measured according to the formula:<sup>S2</sup>

$$n \text{ (mol)} = \text{metal loading on GCE} \cdot \text{metal content} / \text{molar mass of metal}$$

All the Ru and Co atoms on the RuCo@NC-T surface are assumed to be the active sites for HER. The metal content was determined by XPS shown in Table. S2. For example, the TOF of RuCo@NC-500 at -0.1 V can be calculated as follows:

$$n_{\text{Ru}} \text{ (mol)} = (2.55 \cdot 10^{-4} \text{ g cm}^{-2} \cdot 0.196 \text{ cm}^2 \cdot 23 \text{ wt}\%) / 101.07 \text{ g mol}^{-1} = 1.137 \cdot 10^{-7} \text{ mol}$$

$$n_{\text{Co}} \text{ (mol)} = (2.55 \cdot 10^{-4} \text{ g cm}^{-2} \cdot 0.196 \text{ cm}^2 \cdot 8 \text{ wt}\%) / 58.93 \text{ g mol}^{-1} = 6.785 \cdot 10^{-8} \text{ mol}$$

$$n_{\text{total}} \text{ (mol)} = n_{\text{Ru}} \text{ (mol)} + n_{\text{Co}} \text{ (mol)} = 1.81 \cdot 10^{-7} \text{ mol}$$

$$\text{TOF (H}_2 \text{ s}^{-1}) = (0.02775 \text{ A cm}^{-2} \cdot 0.196 \text{ cm}^2) / (2 \cdot 96485.3 \text{ C mol}^{-1} \cdot 1.81 \cdot 10^{-7} \text{ mol}) = 0.156 \text{ s}^{-1}$$

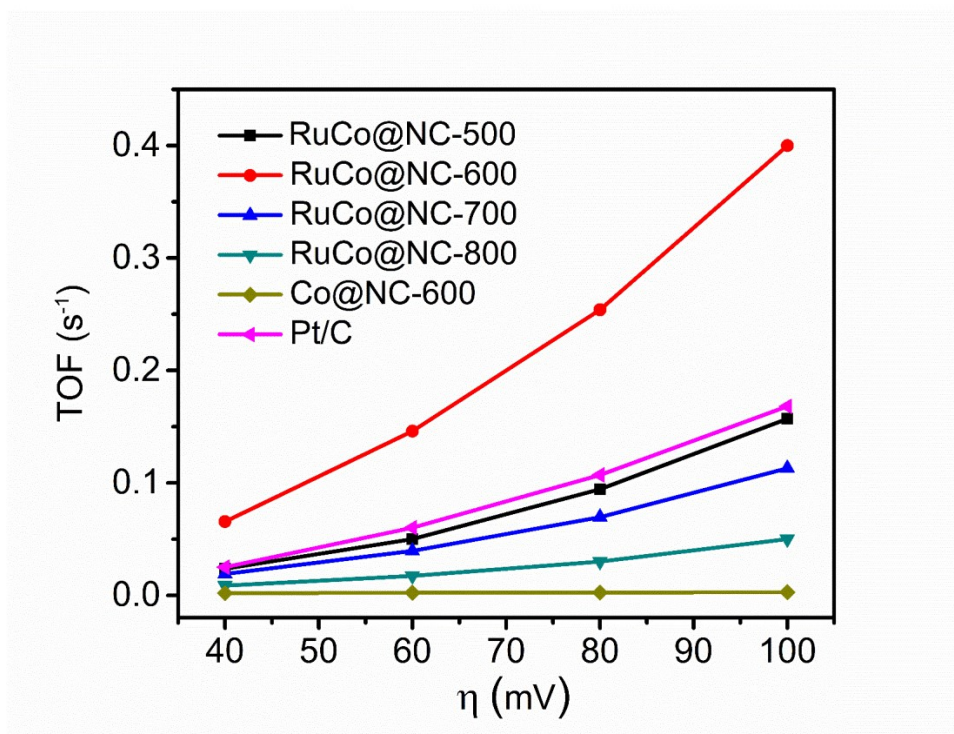

**Fig. S10.** The TOF values of samples calculated at different overpotentials ( $\eta=20, 40, 60, 80$  and  $100$  mV) in  $1.0$  M KOH solution.

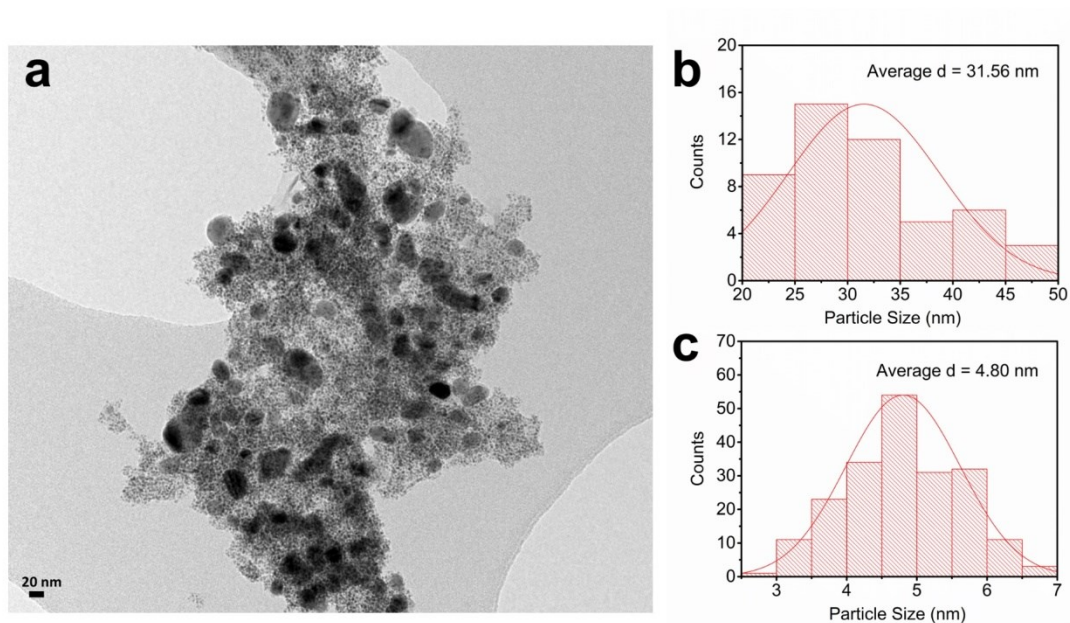

**Fig. S11.** (a) TEM image of RuCo@NC-600 and corresponding particle size distribution diagrams of (b) large and (c) small RuCo alloy NPs after the electrocatalytic HER stability test in  $1.0$  M KOH solution.

### Faradaic efficiency

The Faradaic efficiency (FE) of hydrogen ( $H_2$ ) can be calculated based on the formula:  $FE\% = n * Z * F / Q * 100\%$ . Here,  $n$  represents the detected amount of  $H_2$  generated from HER.  $Z$  represents the specific number of electrons to form a hydrogen molecule ( $Z=2$ ).  $F$  is the Faradaic constant ( $96485.3 \text{ C mol}^{-1}$ ).  $Q$  represents the total charge passed through the working electrode.<sup>S3,S4</sup>

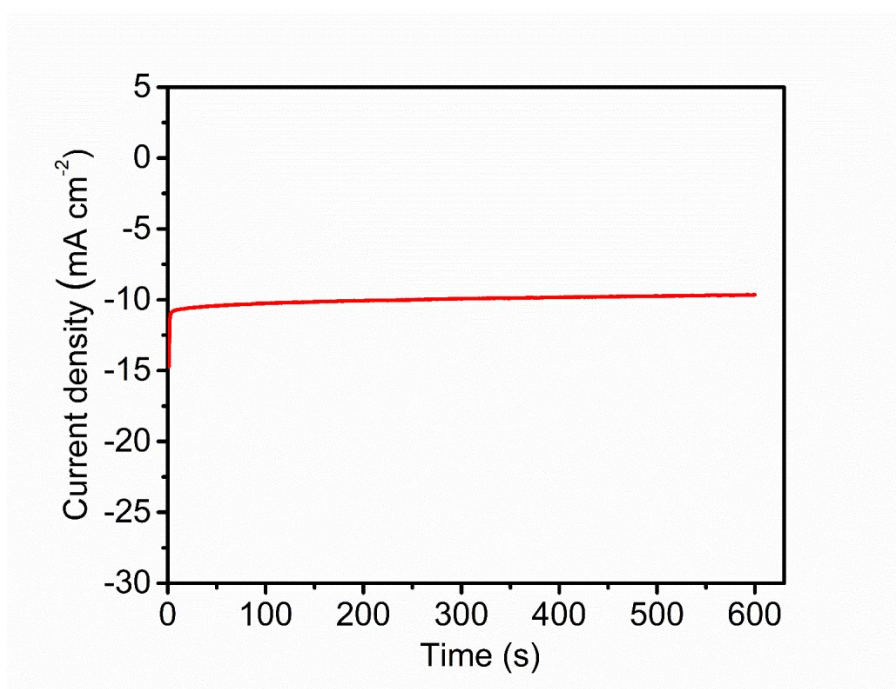

**Fig. S12.** Chronoamperometric curves of RuCo@NC-600 obtained at -0.045 V vs RHE for hydrogen quantification in 1.0 M KOH.

When 1.2 C of charge ( $Q$ ) passed through the working electrode, the amount of  $H_2$  ( $n$ ) measured from gas chromatography (GC) was  $6.1 \mu\text{mol}$ . Considering the systematic error such as the release of  $H_2$  from the electrochemical cell during the transport to GC, approximately  $\pm 2\%$  error bar is provided.

$$FE\% = n * Z * F / Q * 100\% = (6.1 * 10^{-6} \text{ mol} * 2 * 96485.3 \text{ C mol}^{-1}) / 1.2 \text{ C} * 100\% = 98.1\% \pm 2\%.$$



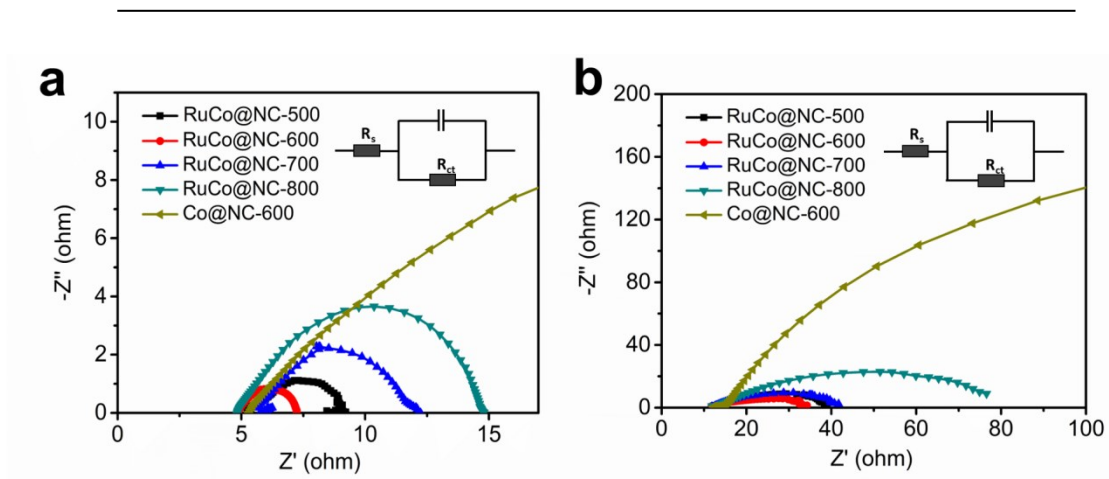

**Fig. S13.** Nyquist plots of RuCo@NC-T and Co@NC-600 in (a) 0.5 M H<sub>2</sub>SO<sub>4</sub> and (b) 1.0 M PBS solutions.

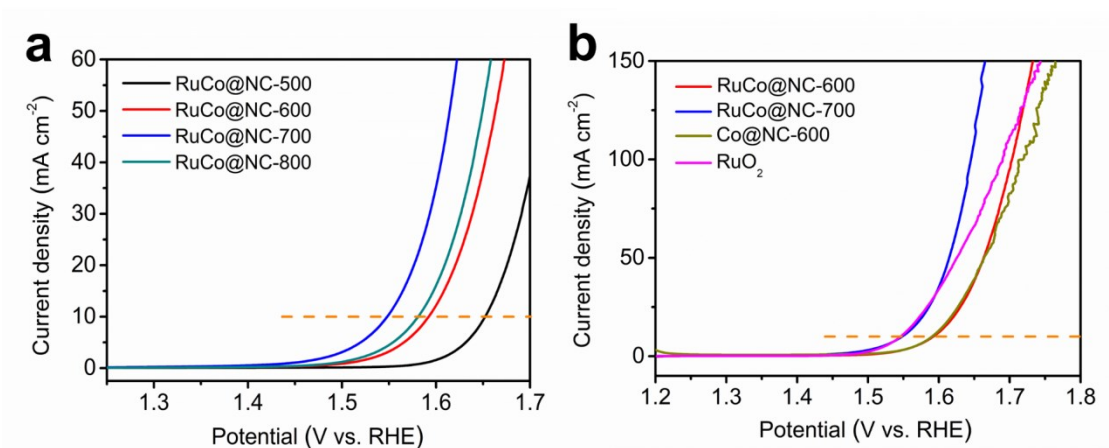

**Fig. S14.** (a, b) The OER polarization curves of samples at a scan rate of 5 mV s<sup>-1</sup> in 1.0 M KOH solution.



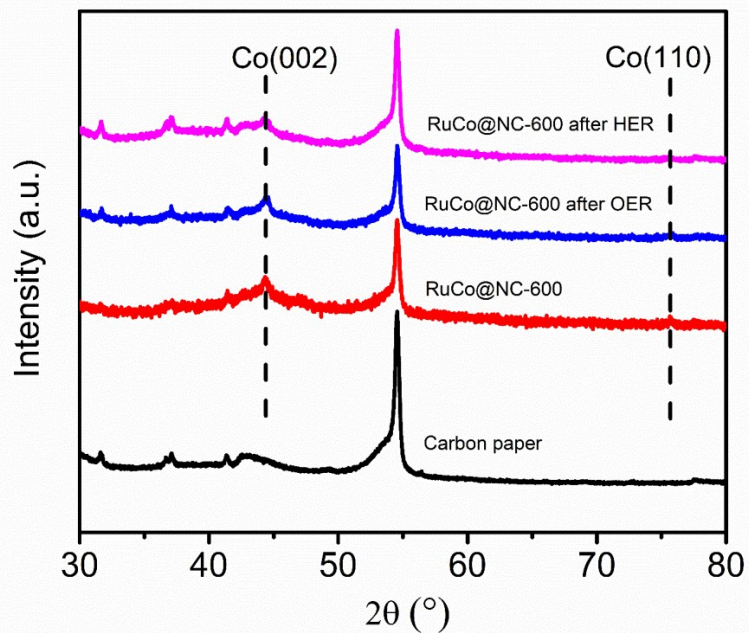

**Fig. S15.** X-ray diffraction patterns of the RuCo@NC-600 loaded on carbon paper before and after water splitting test, and blank carbon paper.

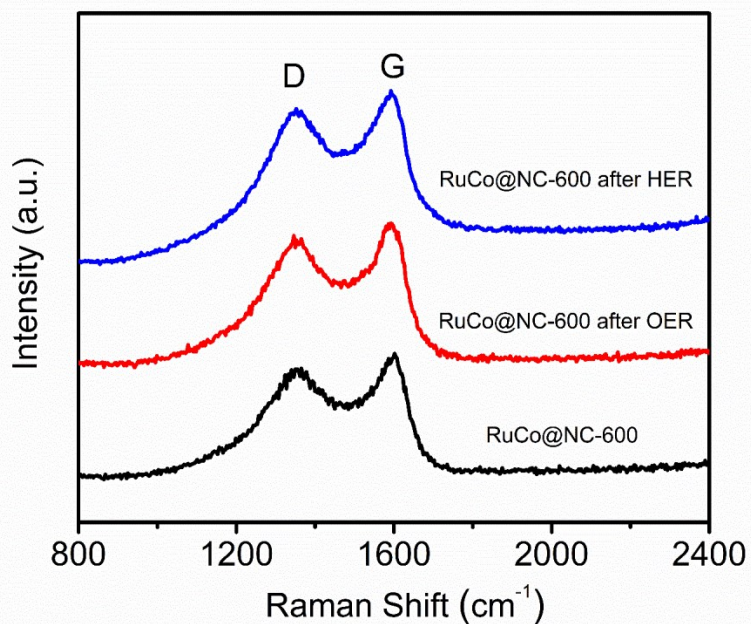

**Fig. S16.** Raman spectra of the RuCo@NC-600 loaded on carbon paper before and after water splitting test.

**Table S1.** BET results of RuCo@NC-T and Co@NC-600.

| Sample      | S <sub>BET</sub> (m <sup>2</sup> g <sup>-1</sup> ) | S <sub>Micropore</sub> (m <sup>2</sup> g <sup>-1</sup> ) | V <sub>pore</sub> (cm <sup>3</sup> g <sup>-1</sup> ) | V <sub>Micropore</sub> (cm <sup>3</sup> g <sup>-1</sup> ) |
|-------------|----------------------------------------------------|----------------------------------------------------------|------------------------------------------------------|-----------------------------------------------------------|
| RuCo@NC-500 | 186.5                                              | 67.1 (36.0 %)                                            | 0.631                                                | 0.028 (4.4 %)                                             |
| RuCo@NC-600 | 165.7                                              | 49.0 (29.6 %)                                            | 0.528                                                | 0.021 (4.0 %)                                             |
| RuCo@NC-700 | 130.8                                              | 49.1 (37.5 %)                                            | 0.391                                                | 0.021 (5.4 %)                                             |
| RuCo@NC-800 | 102.6                                              | 25.0 (24.4 %)                                            | 0.307                                                | 0.011 (3.6 %)                                             |
| Co@NC-600   | 159.3                                              | 36.1 (22.7%)                                             | 0.238                                                | 0.015 (6.3 %)                                             |

**Table S2.** The Ru and Co content in RuCo@NC-T and Co@NC-600 characterized by XPS spectrum.

| Sample      | Ru content (at%) | Co content (at%) | Atomic ratio of Ru to Co (at%/at%) |
|-------------|------------------|------------------|------------------------------------|
| RuCo@NC-500 | 3.73             | 2.22             | 1.68                               |
| RuCo@NC-600 | 3.66             | 3.34             | 1.10                               |
| RuCo@NC-700 | 3.64             | 2.11             | 1.73                               |
| RuCo@NC-800 | 3.58             | 3.26             | 1.10                               |
| Co@NC-600   | -                | 4.69             | -                                  |

**Table S3.** Comparison of catalytic performance of RuCo@NC-600 with reported representative state-of-the-art HER electrocatalysts in 1.0 M KOH.

| Catalysts                              | Substrate    | Loading amount (mg cm <sup>-2</sup> ) | Overpotential at 10 mA cm <sup>-2</sup> (mV) | Tafel slope (mV dec <sup>-1</sup> ) | References                                                   |
|----------------------------------------|--------------|---------------------------------------|----------------------------------------------|-------------------------------------|--------------------------------------------------------------|
| RuCo@NC-600                            | Glass carbon | 0.255                                 | 34                                           | 36                                  | This work                                                    |
| 0.4-Ru@NG-750                          | Glass carbon | N.A. <sup>[a]</sup>                   | 40                                           | 36                                  | <i>ACS Catal.</i> <b>2019</b> , <i>9</i> , 9897              |
| Ru <sub>1</sub> Ni <sub>1</sub> -NCNFs | Glass carbon | 0.612                                 | 35                                           | 30                                  | <i>Adv. Sci.</i> <b>2020</b> , <i>7</i> , 1901833            |
| RuP <sub>2</sub> @NPC                  | Glass carbon | 1.0                                   | 52                                           | 69                                  | <i>Angew. Chem. Int. Ed.</i> <b>2017</b> , <i>56</i> , 11559 |
| Ru@CN                                  | Glass carbon | 0.273                                 | 32                                           | 53                                  | <i>Energy Environ. Sci.</i> <b>2018</b> , <i>11</i> , 800    |

|                                                    |              |       |       |      |                                                              |
|----------------------------------------------------|--------------|-------|-------|------|--------------------------------------------------------------|
| NiRu@N-C                                           | Glass carbon | 0.273 | 32    | 64   | <i>J. Mater. Chem. A</i><br><b>2018</b> , 6, 1376            |
| CoRu@NC-2                                          | Glass carbon | 0.273 | 45    | 66   | <i>Nanotechnology</i><br><b>2018</b> , 29, 225403            |
| Ru/C <sub>3</sub> N <sub>4</sub> /C <sup>[b]</sup> | Glass carbon | 0.204 | 79    | N.A. | <i>J. Am. Chem. Soc.</i><br><b>2016</b> , 138, 16174         |
| SA-Ru-MoS <sub>2</sub>                             | Glass carbon | 0.285 | 76    | 21   | <i>Small Methods</i><br><b>2019</b> , 3, 1900653             |
| RuO <sub>2</sub> /Co <sub>3</sub> O <sub>4</sub>   | Glass carbon | 0.285 | 89    | 91   | <i>RSC Adv.</i><br><b>2017</b> , 7, 3686                     |
| Cu <sub>2-x</sub> @RuNPS                           | Glass carbon | 0.23  | 82    | 48   | <i>Small</i><br><b>2017</b> , 13, 1700052                    |
| Ru <sub>1</sub> @Co/NC                             | Glass carbon | 0.163 | 103   | 210  | <i>Angew. Chem. Int. Ed.</i><br><b>2019</b> , 58, 11868      |
| Ni-MOF@Pt                                          | Glass carbon | 0.2   | 102   | 88   | <i>Nano Lett.</i><br><b>2019</b> , 19, 8447                  |
| IrCo@NC-500                                        | Glass carbon | 0.285 | 45    | 80   | <i>Adv. Mater.</i><br><b>2018</b> , 30, 1705324              |
| Co <sub>2</sub> Ni <sub>1</sub> N                  | Carbon cloth | N.A.  | 102.6 | 60   | <i>ACS Appl. Mater. Interfaces</i><br><b>2019</b> , 11, 8018 |
| CoMoS <sub>x</sub>                                 | Ni foam      | 2     | 89    | 94   | <i>Angew. Chem. Int. Ed.</i><br><b>2020</b> , 59, 1659       |
| S-CoWP@(S,N)-C                                     | Glass carbon | 0.75  | 67    | 66   | <i>ACS Energy Lett.</i><br><b>2018</b> , 3, 1434             |

Note: CNF, Carbon nanofibers. [a]: N. A. = Not available. [b]: The electrolyte is 0.1 M KOH.

**Table S4.** Comparison of catalytic performance of RuCo@NC-600 with reported representative state-of-the-art HER electrocatalysts in 0.5 M H<sub>2</sub>SO<sub>4</sub>.

| Catalysts   | Substrate    | Loading amount (mg cm <sup>-2</sup> ) | Overpotential at 10 mA cm <sup>-2</sup> (mV) | Tafel slope (mV dec <sup>-1</sup> ) | References |
|-------------|--------------|---------------------------------------|----------------------------------------------|-------------------------------------|------------|
| RuCo@NC-600 | Glass carbon | 0.255                                 | 6                                            | 26                                  | This work  |

|                                                                     |              |                     |      |      |                                                               |
|---------------------------------------------------------------------|--------------|---------------------|------|------|---------------------------------------------------------------|
| Ru@C <sub>2</sub> N                                                 | Glass carbon | 0.285               | 22   | 30   | <i>Nature Nanotech.</i><br><b>2017</b> , 12, 441              |
| Ru <sub>1</sub> Ni <sub>1</sub> -NCNFs                              | Glass carbon | 0.612               | 23   | 29   | <i>Adv. Sci.</i><br><b>2020</b> , 7, 1901833                  |
| PtRu@RFCS-6h                                                        | Glass carbon | 0.354               | 19.7 | 27.2 | <i>Energy Environ. Sci.</i><br><b>2018</b> , 11, 1232         |
| RuCu NSs/C-250 °C                                                   | Glass carbon | N.A. <sup>[a]</sup> | 19   | 26   | <i>Angew. Chem. Int. Ed.</i><br><b>2019</b> , 58, 13983       |
| hcp-Ru@N                                                            | Glass carbon | 0.28                | 27.5 | 37   | <i>ACS Catal.</i><br><b>2018</b> , 8, 5714                    |
| Mo <sub>2</sub> C@Ru                                                | Glass carbon | 0.275               | 24.6 | 58.4 | <i>ACS Appl. Mater. Interfaces</i><br><b>2018</b> , 10, 32171 |
| RuP <sub>2</sub> @NPC                                               | Glass carbon | 1.0                 | 38   | 38   | <i>Angew. Chem. Int. Ed.</i><br><b>2017</b> , 56, 11559       |
| Ru@CN                                                               | Glass carbon | 0.273               | 126  | 47   | <i>Energy Environ. Sci.</i><br><b>2018</b> , 11, 800          |
| NiRu@N-C                                                            | Glass carbon | 0.273               | 50   | 31   | <i>J. Mater. Chem. A</i><br><b>2018</b> , 6, 1376             |
| CoRu@NC-2                                                           | Glass carbon | 0.273               | 32   | 47   | <i>Nanotechnology</i><br><b>2018</b> , 29, 225403             |
| Ru@N-g-CN                                                           | Glass carbon | 0.85                | 43.7 | 55   | <i>J. Mater. Chem. A</i><br><b>2018</b> , 6, 13859            |
| Ru@Co-SAs/N-C                                                       | Glass carbon | 0.285               | 57   | 55   | <i>Nano Energy</i><br><b>2019</b> , 59, 472                   |
| Ru-MoO <sub>2</sub>                                                 | Glass carbon | 0.285               | 55   | 44   | <i>J. Mater. Chem. A</i><br><b>2017</b> , 5, 5475             |
| Ru-HPC                                                              | Glass carbon | 0.2                 | 61.6 | 66.8 | <i>Nano Energy</i><br><b>2019</b> , 58, 1                     |
| C <sub>3</sub> N <sub>4</sub> -Ru                                   | Glass carbon | 0.153               | 140  | 57   | <i>J. Mater. Chem. A</i><br><b>2017</b> , 5, 18261            |
| Ru SAs@PN                                                           | Carbon paper | 1.0                 | 24   | 38   | <i>Angew. Chem. Int. Ed.</i><br><b>2018</b> , 57, 9495        |
| Ru <sub>SA</sub> -N-S-Ti <sub>3</sub> C <sub>2</sub> T <sub>x</sub> | Carbon paper | 1.0                 | 76   | 90   | <i>Adv. Mater.</i><br><b>2019</b> , 31, 1903841               |



|                                   |              |       |     |      |                                                              |
|-----------------------------------|--------------|-------|-----|------|--------------------------------------------------------------|
| Ru/MeOH/THF                       | Glass carbon | 0.352 | 83  | 46   | <i>Chem. Commun.</i><br><b>2017</b> , 53, 11713              |
| Ni-MOF@Pt                         | Glass carbon | 0.2   | 43  | 30   | <i>Nano Lett.</i><br><b>2019</b> , 19, 8447                  |
| IrCo@NC-500                       | Glass carbon | 0.285 | 24  | 23   | <i>Adv. Mater.</i><br><b>2018</b> , 30, 1705324              |
| PtCoFe@CN                         | Glass carbon | 0.285 | 45  | 32   | <i>ACS Appl. Mater. Interfaces</i><br><b>2017</b> , 9, 3596  |
| CoPd@NC                           | Glass carbon | 0.285 | 80  | 31   | <i>ACS Appl. Mater. Interfaces</i><br><b>2016</b> , 8, 13378 |
| Co <sub>2</sub> Ni <sub>1</sub> N | Carbon cloth | N.A.  | 92  | 55.3 | <i>ACS Appl. Mater. Interfaces</i><br><b>2019</b> , 11, 8018 |
| CuCo@NC                           | Glass carbon | 0.182 | 145 | 79   | <i>Adv. Energy Mater.</i><br><b>2017</b> , 7, 1700193        |
| S-CoWP@(S,N)-C                    | Glass carbon | 0.75  | 35  | 35   | <i>ACS Energy Lett.</i><br><b>2018</b> , 3, 1434             |

Note: CNF, Carbon nanofibers; RFCS, Resorcinol-formaldehyde carbon spheres; NS, Nanosheet; hcp, Hexagonal-closed-packed; HPC, Hierarchically porous carbon; HPN, Amorphous phosphorus nitride imide nanotubes. [a]: N. A. = Not available.

**Table S5.** Comparison of catalytic performance of RuCo@NC-600 with reported representative state-of-the-art HER electrocatalysts in 1.0 M PBS.

| Catalysts                  | Substrate    | Loading amount (mg cm <sup>-2</sup> ) | Overpotential at 10 mA cm <sup>-2</sup> (mV) | Tafel slope (mV dec <sup>-1</sup> ) | References                                              |
|----------------------------|--------------|---------------------------------------|----------------------------------------------|-------------------------------------|---------------------------------------------------------|
| RuCo@NC-600                | Glass carbon | 0.255                                 | 60                                           | 38                                  | This work                                               |
| Ru@Co-SAs/N-C              | Glass carbon | 0.285                                 | 55                                           | 82                                  | <i>Nano Energy</i><br><b>2019</b> , 59, 472             |
| RuP <sub>2</sub> @NPC      | Glass carbon | 1.0                                   | 57                                           | 87                                  | <i>Angew. Chem. Int. Ed.</i><br><b>2017</b> , 56, 11559 |
| Ru/MeOH/THF <sup>[a]</sup> | Glass carbon | 0.352                                 | 83                                           | 80                                  | <i>Chem. Commun.</i><br><b>2017</b> , 53, 11713         |

|                                                               |              |       |       |                     |                                                              |
|---------------------------------------------------------------|--------------|-------|-------|---------------------|--------------------------------------------------------------|
| Ru@CN <sup>[a]</sup>                                          | Glass carbon | 0.273 | 100   | N.A. <sup>[b]</sup> | <i>Energy Environ. Sci.</i><br><b>2018</b> , 11, 800         |
| Ru@N-g-CN <sup>[a]</sup>                                      | Glass carbon | 0.85  | 144   | 133                 | <i>J. Mater. Chem. A</i><br><b>2018</b> , 6, 13859           |
| D-RuO <sub>2</sub> -CN <sub>x</sub>                           | Glass carbon | 0.28  | 135   | 135                 | <i>ACS Appl. Mater. Interfaces</i><br><b>2016</b> , 8, 28678 |
| Ni <sub>0.33</sub> Co <sub>0.67</sub> S <sub>2</sub> nanowire | Glass carbon | 0.3   | 72    | 67.8                | <i>Adv. Energy Mater.</i><br><b>2015</b> , 5, 1402031        |
| Co <sub>2</sub> Ni <sub>1</sub> N                             | Carbon cloth | N.A.  | 152.8 | 90.3                | <i>ACS Appl. Mater. Interfaces</i><br><b>2019</b> , 11, 8018 |
| NiRu@N-C                                                      | Glass carbon | 0.273 | 482   | N.A.                | <i>J. Mater. Chem. A</i><br><b>2018</b> , 6, 1376            |
| CoRu@NC-2                                                     | Glass carbon | 0.273 | 425   | N.A.                | <i>Nanotechnology</i><br><b>2018</b> , 29, 225403            |

Note: [a]: The electrolyte is 0.1 M PBS. [b]: N. A. = Not available.

## Reference

- S1 T. Feng, G. Yu, S. Tao, S. Zhu, R. Ku, R. Zhang, Q. Zeng, M. Yang, Y. Chen, W. Chen, W. Chen, B. Yang, *J. Mater. Chem. A*, 2020, 8, 9638-9645.
- S2 H. Wang, C. Gao, R. Li, Z. Peng, J. Yang, J. Gao, Y. Yang, S. Li, B. Li, Z. Liu, *ACS Sustainable Chem. Eng.*, 2019, 7, 18744-18752.
- S3 S. Dutta, H. Han, M. Je, H. Choi, J. Kwon, K. Park, A. Indra, K. M. Kim, U. Paik, T. Song, *Nano Energy*, 2020, 67, 104245.
- S4 Z. Li, J. Fu, Y. Feng, C. Dong, H. Liu, X. Du, *Nat. Catal.*, 2019, 2, 1107-1114.
